# Supplementary material
Source: Frontiers journal article supplement (https://www.frontiersin.org/articles/520138)
Supplement: Image_1.PDF [file Image_1.PDF]

**Supplementary Figure 1. ROC curve for the model using random forest (the best single classifiers in the super learner ensemble) developed to predict suicides within 12-months of hospital discharge applied in the holdout sample to predict suicides over each of the 5 time horizons**

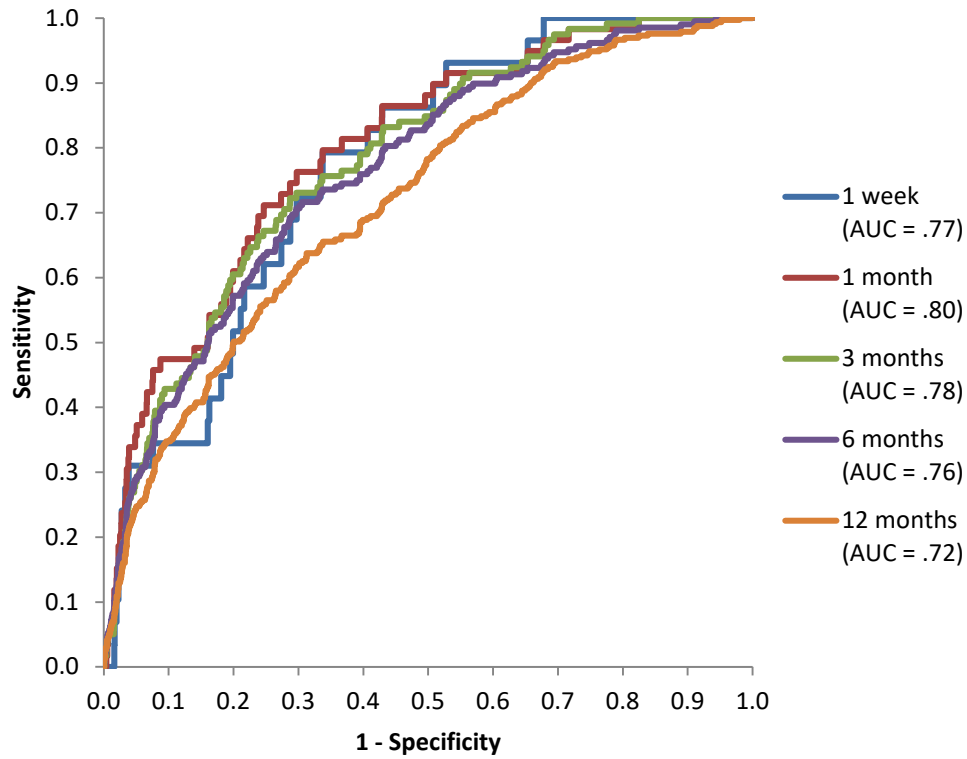

Abbreviations. ROC curve, receiver operating characteristic curve; AUC, area under the curve.
